# Supplementary material
Source: publisher site journal article supplement (https://www.dovepress.com/article/416049)
Supplement: Supplementary file 1 [file get_supplementary_file.php]

**Supporting Information**

**Polydopamine modified ceria nanorods alleviate inflammation in colitis by scavenging ROS and regulating macrophage M2 polarization**

Bingqing Zhang1†, Qiang Li1†, Qinglin Xu1, Baochao Li1, Heng Dong1* and Yongbin Mou1, *

1. Nanjing Stomatological Hospital, Medical School of Nanjing University, Nanjing, China.

†These authors contributed equally to this study.

***Corresponding author:**

Yongbin Mou, yongbinmou@nju.edu.cn; Heng Dong, dongheng90@smail.nju.edu.cn. Nanjing Stomatological Hospital, Medical School of Nanjing University, #30 Zhongyang Road, Nanjing 210008, China.

**Table S1. Primer sequences for RT-qPCR**

| **Genes** | **Forward (5' to 3'）** | **Reverse (3' to 5'）** |
| --- | --- | --- |
| **iNOS** | ACATCGACCCGTCCACAGTAT | CAGAGGGGTAGGCTTGTCTC |
| **IL-6** | TAGTCCTTCCTACCCCAATTTCC | TTGGTCCTTAGCCACTCCTTC |
| **TNF-α** | CTGAACTTCGGGGTGATCGG | GGCTTGTCACTCGAATTTTGAGA |
| **IL-1β** | CTGTGACTCATGGGATGATGATG | CGGAGCCTGTAGTGCAGTTG |
| **Arg-1** | TGTCCCTAATGACAGCTCCTT | GCATCCACCCAAATGACACAT |
| **IL-10** | CTTACTGACTGGCATGAGGATCA | GCAGCTCTAGGAGCATGTGG |
| **GAPDH** | AGGTCGGTGTGAACGGATTTG | GGGGTCGTTGATGGCAACA |

**Table S2. Scoring of disease activity index (DAI)**

|  | **0** | **1** | **2** | **3** | **4** |
| --- | --- | --- | --- | --- | --- |
| **Weight loss** | None | 1%-5% | 5%-10% | 10%-20% | >20% |
| **Stool trait** | Normal | Loose stool | Watery diarrhea | Slimy diarrhea, little blood | Severe watery diarrhea with blood |
| **Bloody stool** | No blood | / | Presence of blood | / | Gross bleeding |

**Note:** Adapted with permission from Liu YJ, Tang B, Wang FC, et al. Parthenolide ameliorates colon inflammation through regulating Treg/Th17 balance in a gut microbiota-dependent manner*.* *Theranostics*. 2020; 10(12): 5225-5241. Copyright©2020. Creative Common.1

**Table S3. Pathological scoring of colon tissue.**

|  | **0** | **1** | **2** | **3** | **4** |
| --- | --- | --- | --- | --- | --- |
| **Inflammation severity** | None | Mild | Moderate | Severe | **/** |
| **Depth of mucosal damage** | None | Mucosal | Mucosal and submucosal | Transmural | **/** |
| **Crypt loss** | None | Basal 1/3 damage | Basal 2/3 damage | Crypt lost, only surface epithelium intact | Entire crypt and epithelium lost |
| **Percent involvement** | None | 1%-25% | 26%-50% | 51%-75% | 76%-100% |

**Note:** Adapted with Binabaj MM, Asgharzadeh F, Avan A, et al. EW-7197 prevents ulcerative colitis-associated fibrosis and inflammation. *J Cell Physiol.* 2019; **234**(7): 11654-11661. Copyright©2018, Wiley Periodicals, Inc.2

**
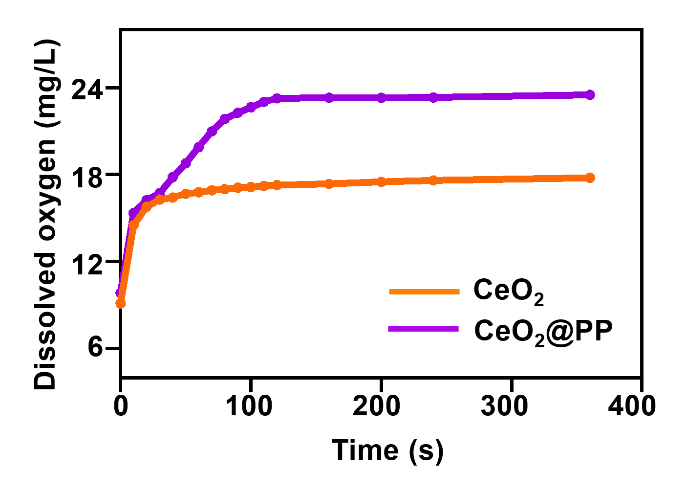
**

**Figure S1. Typical kinetic curves of oxygen production of CeO2 NRs and CeO2@PP in H2O2 aqueous solution.**

**
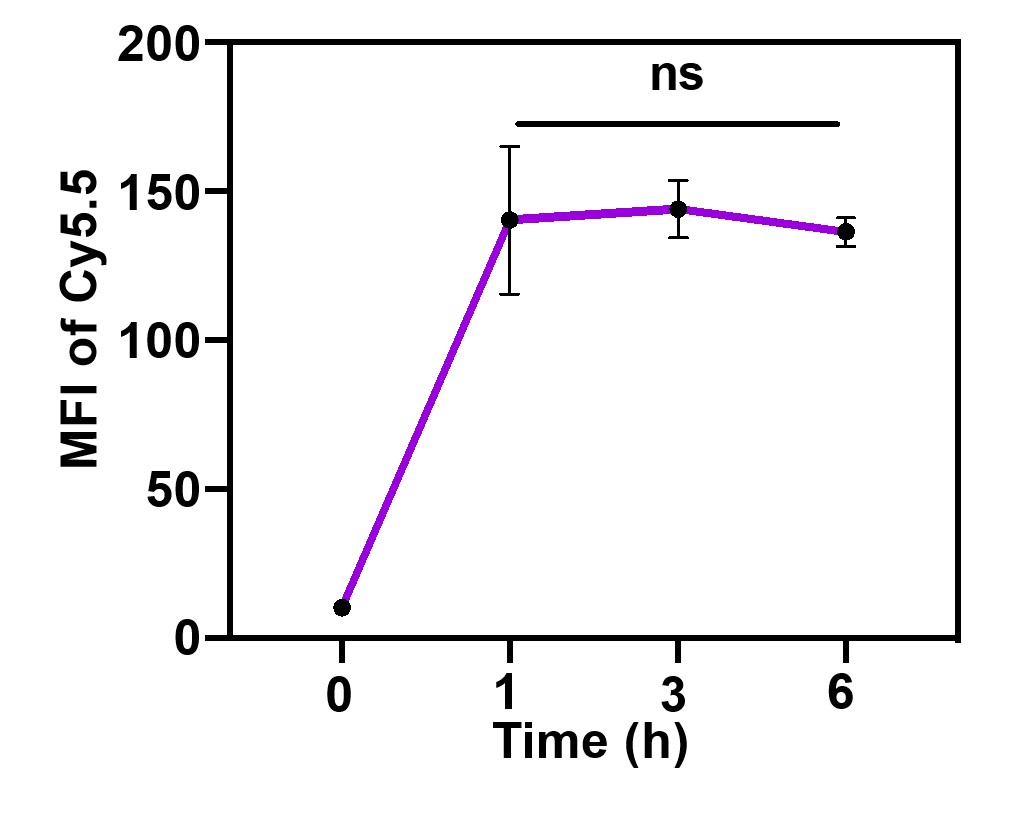
**

**Figure S2. Cell uptake ability of CeO2@PP. (ns, not significant)**

**
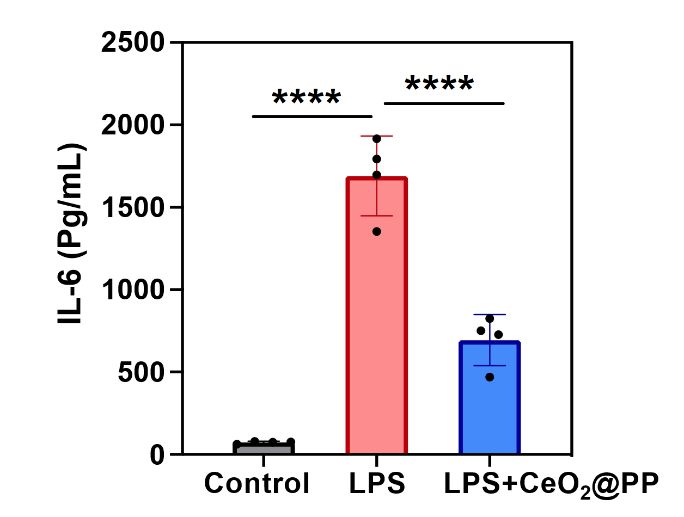
**

**Figure S3. The level of IL-6 proinflammatory cytokine by Elisa assay. (*****P*< 0.0001)**


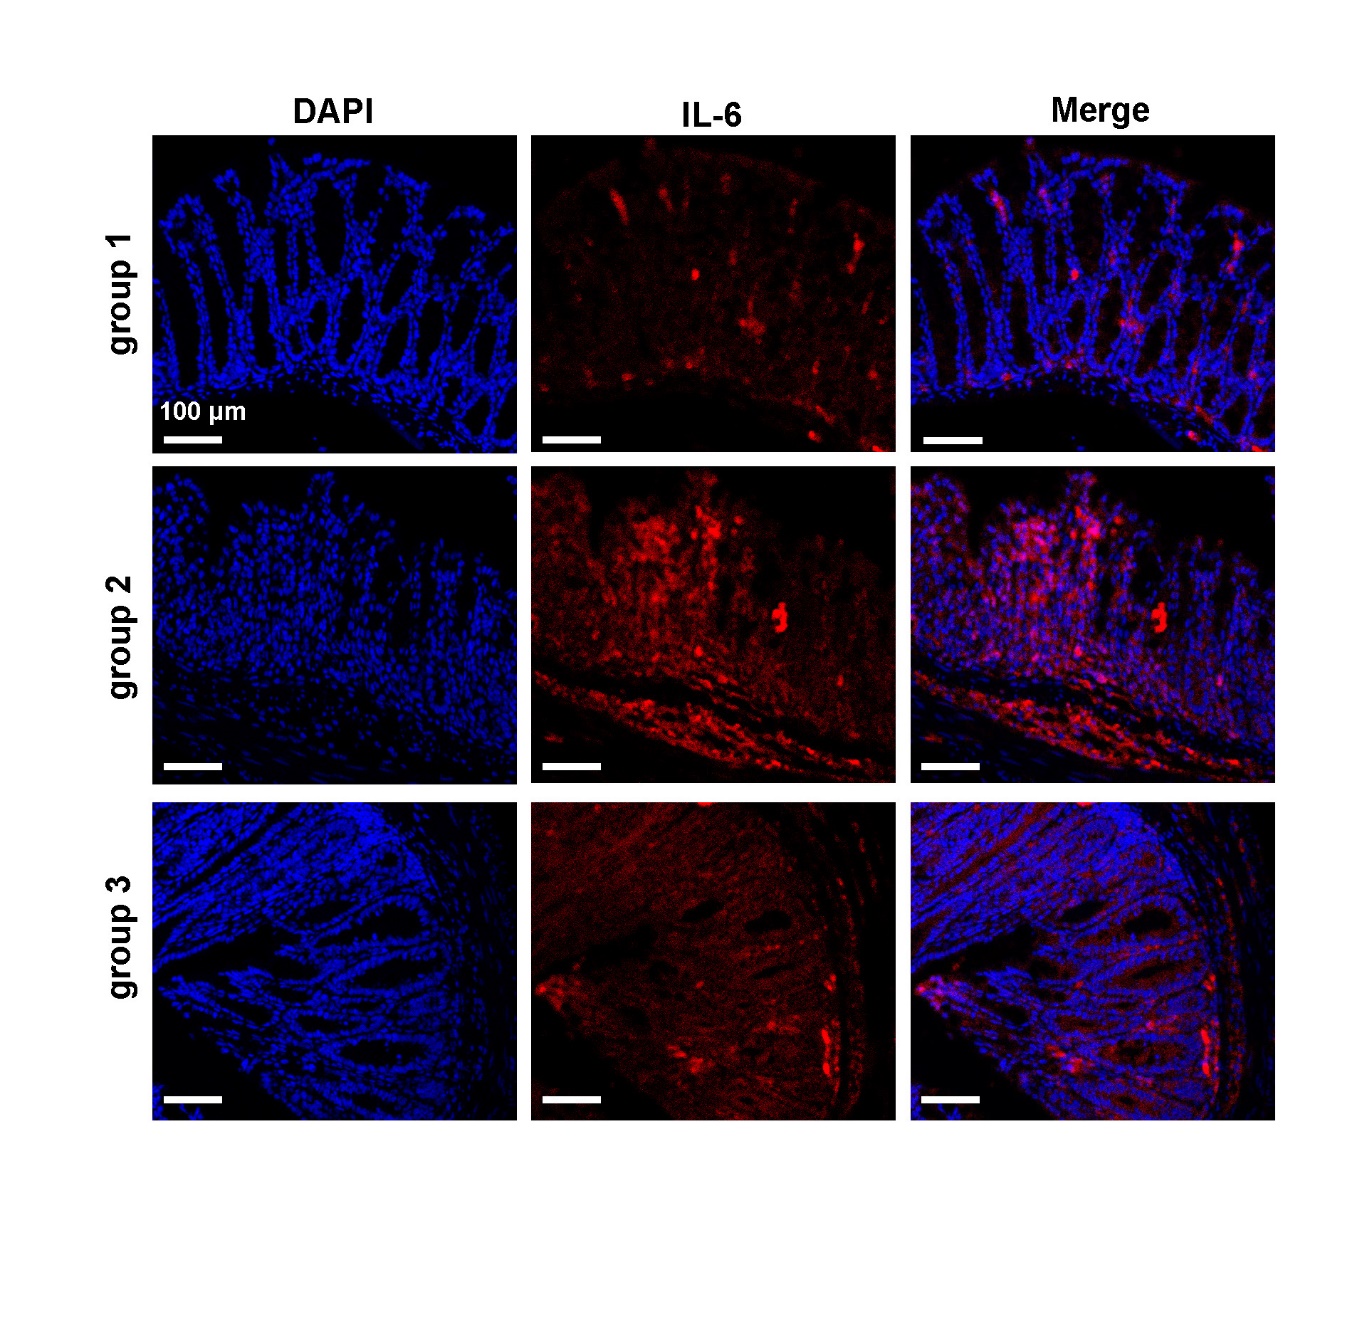


**Figure S4. Immunofluorescence staining of IL-6 in colitis.**


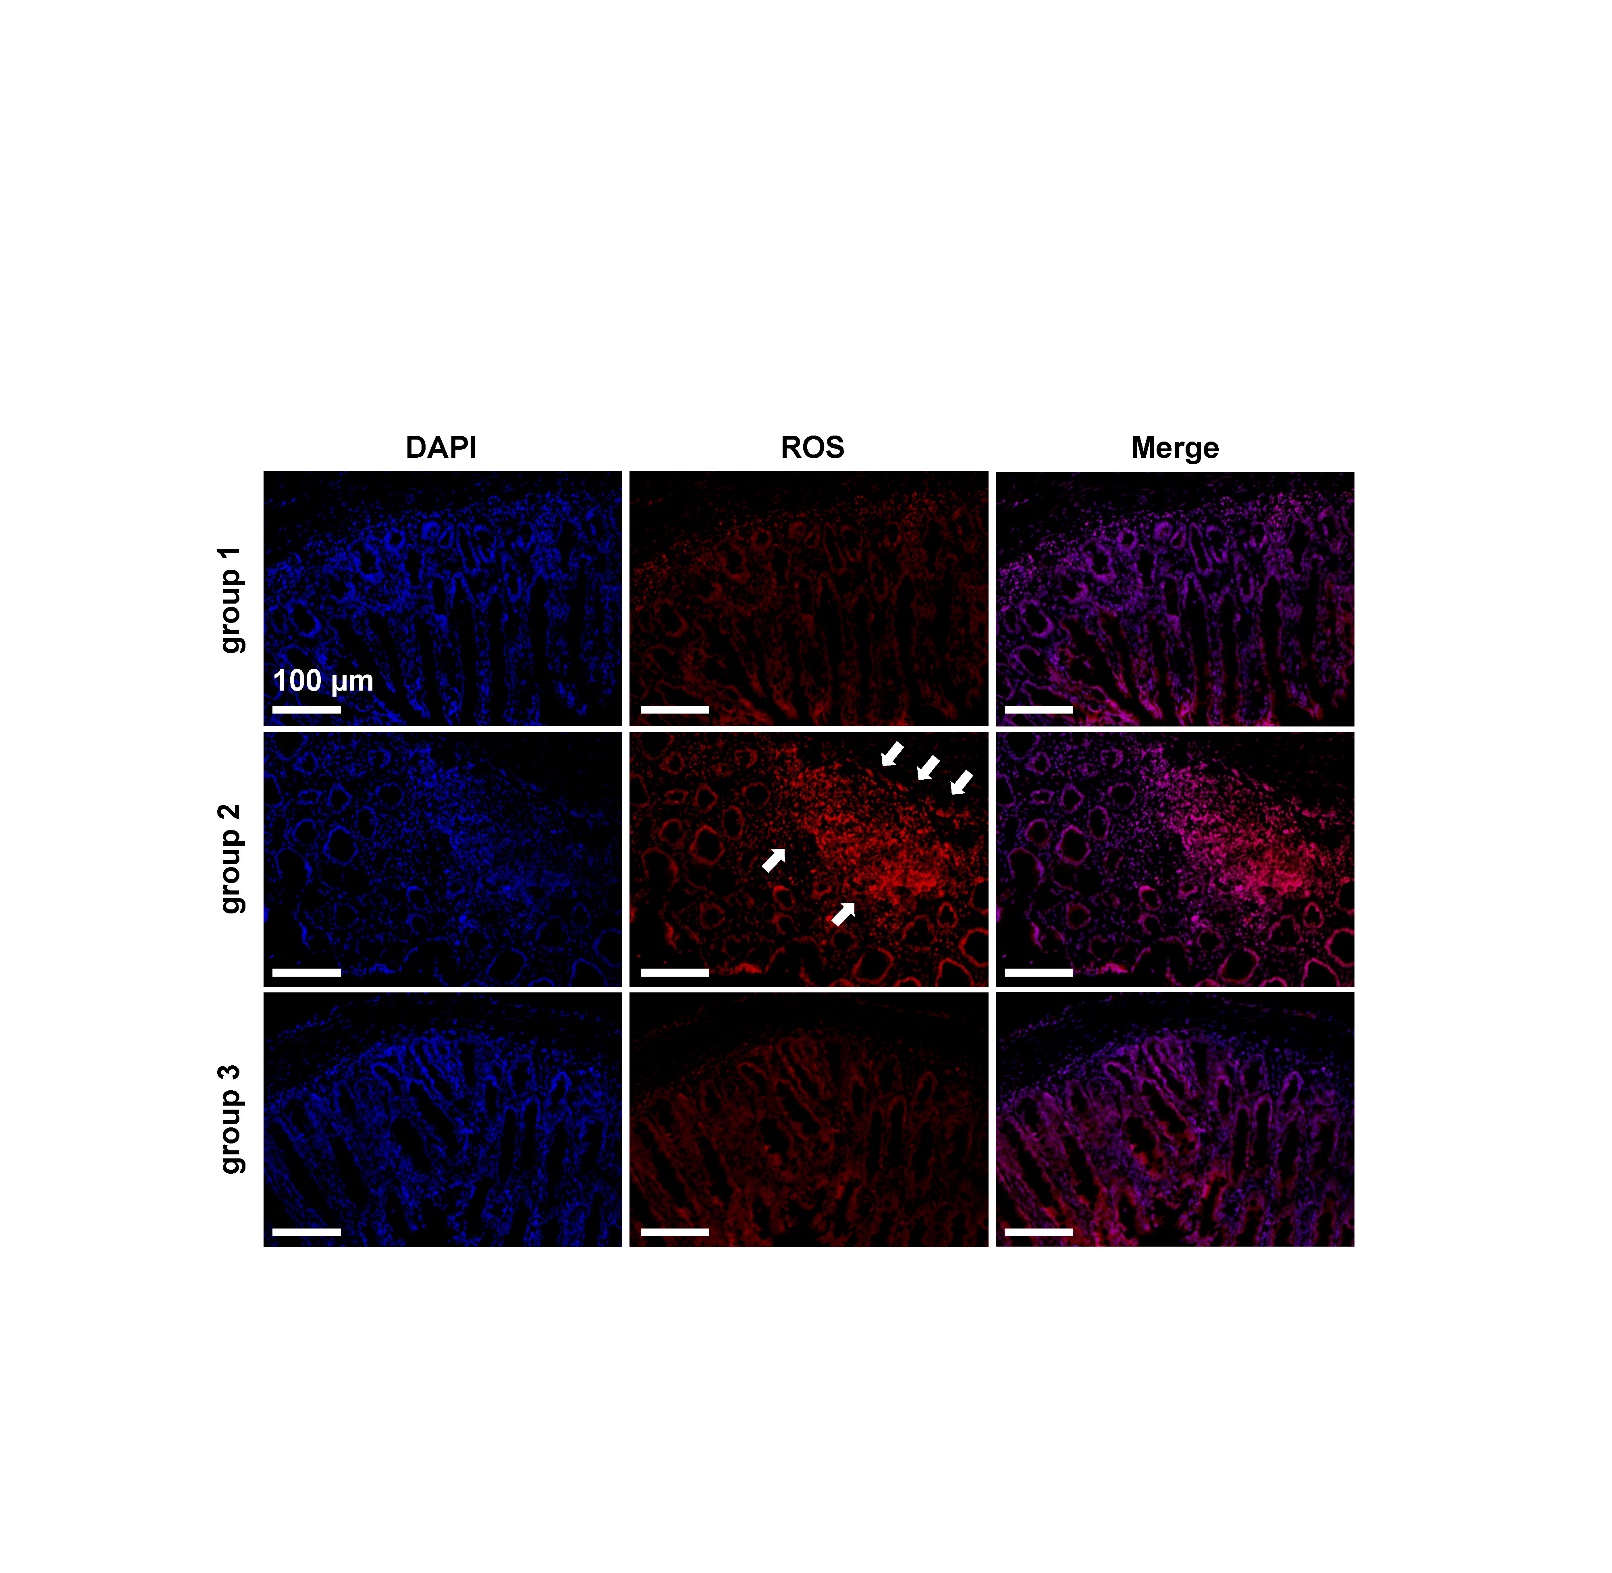


**Figure S5. Immunofluorescence staining of ROS in colitis.** White arrows indicate ROS enrichment areas

**References**

1. Liu YJ, Tang B, Wang FC, et al. Parthenolide ameliorates colon inflammation through regulating Treg/Th17 balance in a gut microbiota-dependent manner*.* *Theranostics*. 2020; 10(12): 5225-5241.

2. Binabaj MM, Asgharzadeh F, Avan A, et al. EW-7197 prevents ulcerative colitis-associated fibrosis and inflammation. *J Cell Physiol.* 2019; 234(7): 11654-11661.
